# Supplementary material for: Prevalence of cervical disease at age 20 after immunisation with bivalent HPV vaccine at age 12-13 in Scotland: retrospective population study
Source: PubMed Central journal article supplement — BMJ. 2019 Apr 3;365:l1161. doi: 10.1136/bmj.l1161 (PMC6446188; doi:10.1136/bmj.l1161), 2019-04-03
Supplement: palt047003.wt1.pdf [file palt047003.wt1.pdf]

|                                                                                              |             | 1988  |       |       |       | 1989  |       |       |       | 1990  |       |       |       | 1991  |       |       |       | 1992  |       |       |       | 1993  |       |       |       | 1994  |       |       |       | 1995  |       |       |       | 1996 |       |       |       |
|----------------------------------------------------------------------------------------------|-------------|-------|-------|-------|-------|-------|-------|-------|-------|-------|-------|-------|-------|-------|-------|-------|-------|-------|-------|-------|-------|-------|-------|-------|-------|-------|-------|-------|-------|-------|-------|-------|-------|------|-------|-------|-------|
|                                                                                              |             | N     | %     | LC    | U     | N    | %     | LC    | U     |
|                                                                                              |             |       |       | I     | CI    |      |       | I     | CI    |
| <b>V</b><br><b>a</b><br><b>c</b><br><b>c</b><br><b>i</b><br><b>n</b><br><b>e</b>             | <b>0</b>    | 17579 | 99.94 | 99.9  | 99.97 | 16731 | 99.58 | 99.47 | 99.67 | 14038 | 80.35 | 79.75 | 80.93 | 4994  | 28.35 | 27.69 | 29.02 | 3002  | 18.01 | 17.43 | 18.6  | 3263  | 20.33 | 19.71 | 20.96 | 2209  | 13.93 | 13.4  | 14.48 | 1665  | 10.94 | 10.45 | 11.44 | 545  | 10.07 | 9.29  | 10.9  |
|                                                                                              | <b>1</b>    | 3     | 0.02  | 0.01  | 0.05  | 22    | 0.13  | 0.09  | 0.2   | 239   | 1.37  | 1.21  | 1.55  | 538   | 3.05  | 2.81  | 3.32  | 415   | 2.49  | 2.26  | 2.74  | 437   | 2.72  | 2.48  | 2.99  | 267   | 1.68  | 1.5   | 1.9   | 101   | 0.66  | 0.55  | 0.81  | 29   | 0.54  | 0.37  | 0.77  |
|                                                                                              | <b>2</b>    | 2     | 0.01  | 0     | 0.04  | 18    | 0.11  | 0.07  | 0.17  | 488   | 2.79  | 2.56  | 3.05  | 1196  | 6.79  | 6.43  | 7.17  | 851   | 5.11  | 4.78  | 5.45  | 833   | 5.19  | 4.86  | 5.54  | 548   | 3.46  | 3.18  | 3.75  | 161   | 1.06  | 0.91  | 1.23  | 38   | 0.7   | 0.51  | 0.96  |
|                                                                                              | <b>3</b>    | 5     | 0.03  | 0.01  | 0.07  | 30    | 0.18  | 0.13  | 0.25  | 2706  | 15.49 | 14.96 | 16.03 | 10890 | 61.81 | 61.09 | 62.53 | 12401 | 74.4  | 73.73 | 75.05 | 11517 | 71.76 | 71.06 | 72.45 | 12830 | 80.93 | 80.31 | 81.53 | 13299 | 87.34 | 86.81 | 87.86 | 4802 | 88.7  | 87.82 | 89.51 |
| <b>C</b><br><b>y</b><br><b>t</b><br><b>o</b><br><b>l</b><br><b>o</b><br><b>g</b><br><b>y</b> | <b>N</b>    | 14500 | 82.44 | 81.87 | 82.99 | 13923 | 82.87 | 82.29 | 83.43 | 14302 | 81.86 | 81.28 | 82.43 | 14780 | 83.89 | 83.34 | 84.43 | 14031 | 84.17 | 83.61 | 84.72 | 13640 | 84.98 | 84.42 | 85.53 | 13452 | 84.85 | 84.28 | 85.4  | 13080 | 85.91 | 85.34 | 86.45 | 4656 | 86    | 85.05 | 86.9  |
|                                                                                              | <b>B/I</b>  | 1819  | 10.34 | 9.9   | 10.8  | 1828  | 10.88 | 10.42 | 11.36 | 2102  | 12.03 | 11.56 | 12.52 | 1939  | 11.01 | 10.55 | 11.48 | 1624  | 9.74  | 9.3   | 10.2  | 1143  | 7.12  | 6.73  | 7.53  | 1112  | 7.01  | 6.63  | 7.42  | 1034  | 6.79  | 6.4   | 7.2   | 365  | 6.74  | 6.1   | 7.44  |
|                                                                                              | <b>LG</b>   | 929   | 5.28  | 4.96  | 5.62  | 779   | 4.64  | 4.33  | 4.97  | 786   | 4.5   | 4.2   | 4.82  | 694   | 3.94  | 3.66  | 4.24  | 869   | 5.21  | 4.89  | 5.56  | 1111  | 6.92  | 6.54  | 7.33  | 1178  | 7.43  | 7.03  | 7.85  | 1061  | 6.97  | 6.57  | 7.38  | 375  | 6.93  | 6.28  | 7.63  |
|                                                                                              | <b>HGM</b>  | 209   | 1.19  | 1.04  | 1.36  | 176   | 1.05  | 0.9   | 1.21  | 191   | 1.09  | 0.95  | 1.26  | 137   | 0.78  | 0.66  | 0.92  | 93    | 0.56  | 0.46  | 0.68  | 102   | 0.64  | 0.52  | 0.77  | 76    | 0.48  | 0.38  | 0.6   | 43    | 0.28  | 0.21  | 0.38  | 13   | 0.24  | 0.14  | 0.41  |
|                                                                                              | <b>HGS+</b> | 132   | 0.75  | 0.63  | 0.89  | 95    | 0.57  | 0.46  | 0.69  | 90    | 0.52  | 0.42  | 0.63  | 68    | 0.39  | 0.3   | 0.49  | 52    | 0.31  | 0.24  | 0.41  | 54    | 0.34  | 0.26  | 0.44  | 36    | 0.23  | 0.16  | 0.31  | 8     | 0.05  | 0.03  | 0.1   | 5    | 0.09  | 0.04  | 0.22  |
| <b>C</b><br><b>o</b><br><b>i</b><br><b>p</b>                                                 | <b>No</b>   | 16909 | 96.13 | 95.84 | 96.41 | 16189 | 96.36 | 96.06 | 96.63 | 16914 | 96.81 | 96.54 | 97.06 | 17184 | 97.54 | 97.3  | 97.76 | 16314 | 97.87 | 97.64 | 98.08 | 15755 | 98.16 | 97.94 | 98.36 | 15576 | 98.25 | 98.03 | 98.44 | 15106 | 99.21 | 99.06 | 99.34 | 5394 | 99.63 | 99.43 | 99.76 |
|                                                                                              | <b>Yes</b>  | 680   | 3.87  | 3.59  | 4.16  | 612   | 3.64  | 3.37  | 3.94  | 557   | 3.19  | 2.94  | 3.46  | 434   | 2.46  | 2.24  | 2.7   | 355   | 2.13  | 1.92  | 2.36  | 295   | 1.84  | 1.64  | 2.06  | 278   | 1.75  | 1.56  | 1.97  | 120   | 0.79  | 0.66  | 0.94  | 20   | 0.37  | 0.24  | 0.57  |
| <b>C</b><br><b>I</b><br><b>N</b>                                                             | <b>neg</b>  | 304   | 1.73  | 1.55  | 1.93  | 311   | 1.85  | 1.66  | 2.07  | 267   | 1.53  | 1.36  | 1.72  | 217   | 1.23  | 1.08  | 1.41  | 175   | 1.05  | 0.91  | 1.22  | 134   | 0.83  | 0.71  | 0.99  | 166   | 1.05  | 0.9   | 1.22  | 65    | 0.43  | 0.34  | 0.54  | 10   | 0.18  | 0.1   | 0.34  |
|                                                                                              | <b>I</b>    | 122   | 0.69  | 0.58  | 0.83  | 102   | 0.61  | 0.5   | 0.74  | 98    | 0.56  | 0.46  | 0.68  | 76    | 0.43  | 0.34  | 0.54  | 63    | 0.38  | 0.3   | 0.48  | 60    | 0.37  | 0.29  | 0.48  | 45    | 0.28  | 0.21  | 0.38  | 26    | 0.17  | 0.12  | 0.25  | 4    | 0.07  | 0.03  | 0.19  |
|                                                                                              | <b>II</b>   | 151   | 0.86  | 0.73  | 1.01  | 118   | 0.7   | 0.59  | 0.84  | 106   | 0.61  | 0.5   | 0.73  | 75    | 0.43  | 0.34  | 0.53  | 64    | 0.38  | 0.3   | 0.49  | 63    | 0.39  | 0.31  | 0.5   | 38    | 0.24  | 0.17  | 0.33  | 20    | 0.13  | 0.09  | 0.2   | 2    | 0.04  | 0.01  | 0.13  |
|                                                                                              | <b>III+</b> | 103   | 0.59  | 0.48  | 0.71  | 81    | 0.48  | 0.39  | 0.6   | 86    | 0.49  | 0.4   | 0.61  | 66    | 0.37  | 0.29  | 0.48  | 53    | 0.32  | 0.24  | 0.42  | 38    | 0.24  | 0.17  | 0.32  | 29    | 0.18  | 0.13  | 0.26  | 9     | 0.06  | 0.03  | 0.11  | 4    | 0.07  | 0.03  | 0.19  |

Supplementary Table

Distribution of Vaccination status, cytology result and histology result by year of birth (n, and percentage with 95% CI)
